# Supplementary material
Source: PubMed Central journal article supplement (PMC8128940)

# SUPPLEMENTAL DIGITAL CONTENT

**FIGURE S1.** Flow cytometry for antibody binding to epithelial cells. B6 or BALB/c tubular epithelial cells (TECs) were either uninfected (MCMV-) or infected with MCMV-GFP (MCMV-GFP+). After 72 hours, cells were detached from plates and incubated with sera as described in Figure 4. Cells were stained with viability dye (Ghost UV450), anti-EpCAM-PE, and anti-mouse IgG-APC and analyzed by flow cytometry. Representative gating for viable epithelial cells expressing GFP are shown.

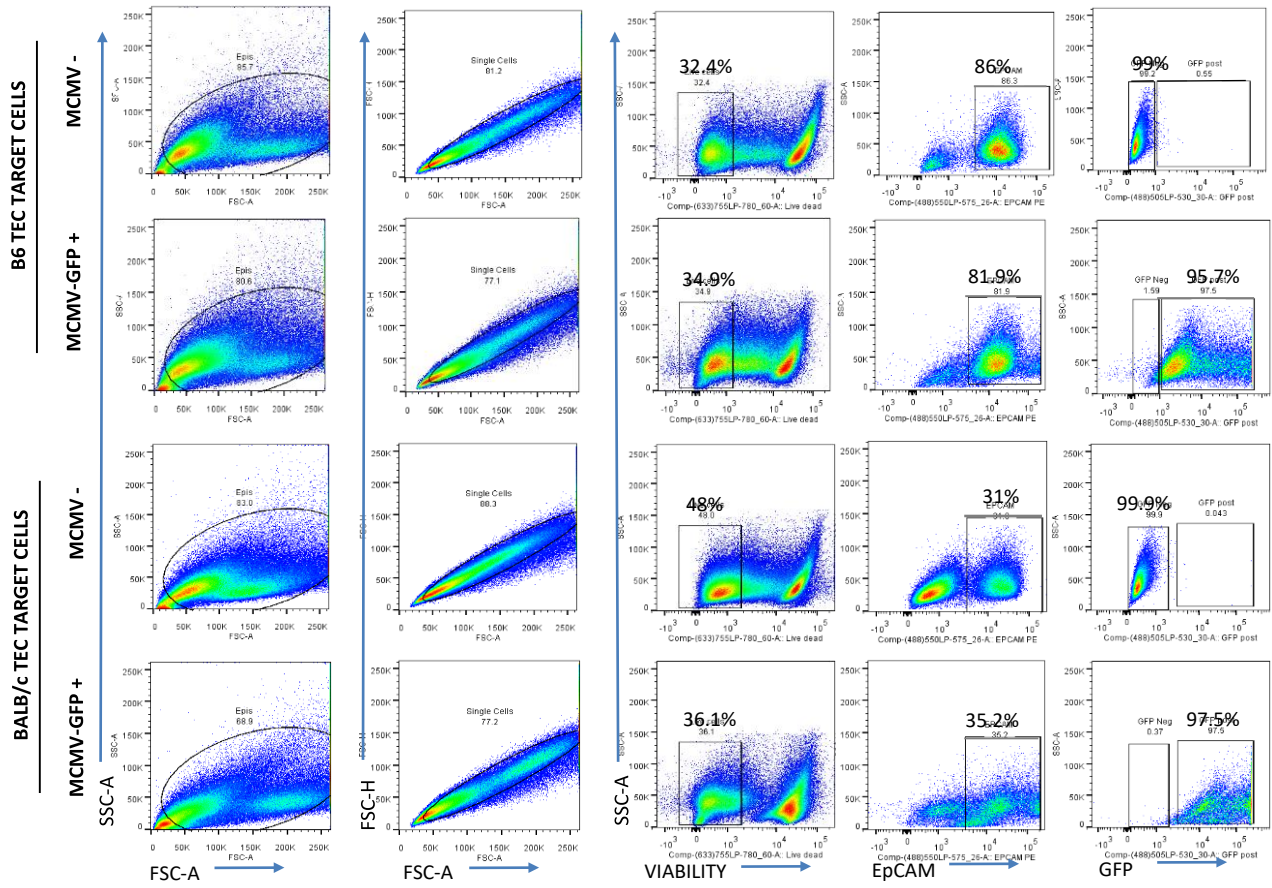

Supplement: NIHMS1646902-supplement-Supplemental_Digital_Content_to_Be_Published__cited_in_text_.pdf [file NIHMS1646902-supplement-Supplemental_Digital_Content_to_Be_Published__cited_in_text_.pdf]
